# Supplementary material
Source: publisher figshare collection journal article supplement (https://frontiersin.figshare.com/ndownloader/files/21024237)
Supplement: Supplementary file [file 21024237]

## **Subclass Trichostomatia Bütschli, 1889\***

\* Diagnoses according to Lynn (2008)

Size, small to large; shape, ovoid to elongate, sometimes with unusual processes and cell appendages; free-swimming; alveoli, typically well-developed, often filled with “skeletal” material; somatic ciliature, variable, from holotrichous to reduced to girdles, bands, or tufts, but with somatic kinetids as for the class; concrement vacuole present in a few forms; extrusomes as somatic mucocysts and oral toxicysts absent; oral region or cavity, typically a densely ciliated vestibulum, with oral cilia sometimes as polybrachykinetids; cytostome, and therefore vestibulum, sometimes antapical; stomatogenesis, telokinetal, but cryptotelokinetal in entodiniomorphids; macronucleus, typically elongate ovoid; micronucleus, present; contractile vacuole, present; cytoproct, often conspicuous; hydrogenosomes, typically replace mitochondria; feeding on bacteria, detritus, plant material ingested by the host, and other ciliates; majority of species endosymbionts in vertebrate hosts; three orders.

### **Order Vestibuliferida de Puytorac et al., 1974**

Somatic ciliature, holotrichous and dense; cortex, often with thick microfilamentous layer between ecto- and endoplasm; oral region a depression or vestibulum, densely ciliated by extensions of somatic kineties, whose cilia do not appear organized as polybrachykinetids; cytostome at base of vestibular cavity; endocommensals in herbivorous placental mammals, but not in marsupials; six families.

#### **Family Balantidiidae Reichenow in Doflein & Reichenow, 1929**

Size, small to medium; shape, ovoid to elongate; free-swimming; somatic ciliature, holotrichous, with clavate cilia in several kineties, as possible homologues of the haptorian brosse; no concrement vacuole; extrusomes as somatic mucocysts; oral cavity apico-ventral, as a vestibular groove less than one-half body length and lined by extensions of somatic kineties, which are accompanied by supernumerary kineties; macronucleus, elongate ellipsoid; micronucleus, present; contractile vacuole, present; cytoproct, likely absent; encystment probable; feeding on bacteria and organic detritus, but also may feed on host intestinal epithelial cells; in marine, freshwater, and terrestrial habitats as endosymbionts in the digestive tracts of diverse vertebrate and invertebrate hosts; three genera.

*Balantidium* Claparede & Lachmann, 1858

*Dillertia* Earl, 1973

*Metacollinia* Jankowski, 1980

*Balantoides* Morey, 1935

*Balantidiopsis* Bütschli, 1889

#### Family Isotrichidae Butschli, 1889

Size, small to medium; shape, ovoid, flattened; free-swimming; somatic ciliature, holotrichous, dense, with sometimes up to 200 kineties; no concrement vacuole, but endoplasmic polysaccharide reserves; extrusomes as somatic mucocysts; oral cavity at or near antapical pole, lined by extensions of somatic kineties, with parental vestibulum migrating anteriorly during stomatogenesis to become the vestibulum of the proter; macronucleus, ellipsoid, may be anchored by a karyophore; micronucleus, present; contractile vacuoles, present, may be multiple; cytoproct in posterior; feeding on bacteria and organic detritus; in terrestrial habitats, widely found as endocommensals in ungulate ruminants, but *Protoisotricha* is from rodents, an *Isotricha* was once reported from the cockroach, and *Aviisotricha* from birds; five genera.

*Aviisotricha* Bardele et al., 2017

*Dasytricha* Schuberg, 1888

*Isotricha* Stein, 1859

*Oligoisotricha* Imai, 1981

*Protoisotricha* Kopperi, 1937

#### Family Paraisotrichidae da Cunha, 1917

Size, small to medium; shape, ovoid to pyriform; free-swimming; somatic ciliature, holotrichous, dense, sometimes slightly spiralled, often with anterior tuft of cilia but ciliature of *Latteuria* confined more to posterior half; extrusomes as somatic mucocysts; concrement vacuole at apical pole; oral region, anterior, with vestibulum ciliated on ventral wall and with cytostome at its base; macronucleus, ellipsoid; micronucleus, present; contractile vacuole, present; feeding on bacteria and organic detritus; in terrestrial habitats, common as endosymbionts in horses, but also in capybaras, guinea pigs, and elephants; three genera and one genus *incertae sedis*.

*Latteuria* Timoshenko & Imai, 1997

*Paraisotricha* Fiorentini, 1890

*Rhizotricha* Wolska, 1964

*Incertae sedis* in Family Paraisotrichidae

*Helicozoster* Latteur, 1967

#### Family Protocaviellidae Grain in Corliss, 1979

Size, small to medium; shape, ovoid to elongate; free-swimming; somatic ciliature, from sparse, somewhat holotrichous to dense holotrichous, sometimes kineties slightly spiralling, with longer cilia as a tuft or band anterior to the oral region; no concrement vacuole; oral region, subapical to subequatorial; oral cavity, funnel- or

trumpet-shaped with adoral polybrachykinety running along the anterior and right edge of the oral cavity opening and vestibular polybrachykinety running along the left wall of the oral cavity, but adoral ciliature absent in *Enterophrya* and *Ogimotopsis*; macronucleus, globular to elongate ellipsoid; micronucleus, present; contractile vacuole, present; cytoproct, present; feeding on bacteria; in terrestrial habitats as endosymbionts in the hindgut of capybaras, guinea pigs, and lagomorphs; nine genera.

*Anacharon* Ito & Imai, 2000

*Cunhamunizia* Ito & Imai, 2000

*Enterophrya* Hasselmann, 1918

*Hydrochoerella* da Cunha & Muniz, 1925

*Ogimotoa* Ito & Imai, 2000

*Ogimotopsis* Ito & Imai, 2000

*Paracunhamunizia* Ito & Imai, 2000

*Protocaviella* Kopperi, 1937

*Uropogon* Ito & Imai, 2000

#### Family Protohalliidae da Cunha & Muniz, 1927

Size, small; shape, ovoid, with apical disc and posterior anal papilla; free swimming; somatic ciliature, holotrichous; oral region, apical, with oral ciliature short, inconspicuous; adoral ciliature divided into three regions, one densely ciliated, crown-shaped on the left anterior of the oral region and the other two, inconspicuous, on the posterior of the oral region; cytostome apical, with cytopharynx supported by prominent, basket-like cytopharyngeal apparatus; macronucleus, ellipsoid; micronucleus, present; contractile vacuole, present; cytoproct, in posterior; feeding on bacteria, smaller protists, and organic detritus; in terrestrial habitats as endosymbionts in the cecum of capybaras; one genus.

*Protohallia* da Cunha & Muniz, 1927

#### Family Pycnotrichidae Poche, 1913

Size, small to large; shape, ovoid; free-swimming; somatic ciliature, holotrichous, dense; cortex, thick, apparently of up to three layers; no concrement vacuole; oral cavity as a long vestibular groove at least one-half body length, lined on its edges by extensions of somatic kineties; cytostome can be subequatorial, posterior or dorsal, depending on the length and orientation of the vestibulum; macronucleus, globular to ellipsoid; micronucleus, present; contractile vacuole, present, sometimes with collecting canals; cytoproct, present; in terrestrial habitats as endosymbionts in various herbivorous vertebrates, including fishes, gundis, hyraxes, capybaras, camels, cattle, water buffaloes, and the red spider monkey; seven genera and one genus *incertae sedis*.

*Collinina* Chatton & Perard, 1924  
*Infundibulorium* Bozhenko, 1925  
*Muniziella* da Fonseca, 1939  
*Nicollella* Chatton & Perard, 1919  
*Pycnothrix* Schubotz, 1909  
*Taliaferria* Hegner & Rees, 1933  
*Vestibulolum* Grim, 1988

*Incertae sedis* in Family Pycnotrichidae  
*Buxtonella* Jameson, 1926

*Incertae sedis* in the Order Vestibuliferida  
*Microcetella* Aescht, 2001

## Order Entodiniomorphida Reichenow in Doflein & Reichenow, 1929

Size, small to large; shape, ovoid, often flattened; pellicle firm and thickened, often drawn out into posterior spines; cortex with thick microfilamentous layer between ecto- and endoplasm; somatic ciliature, typically greatly reduced, appearing only in bands, zones or tufts, often as polybrachykineties; concrement vacuole may be present; oral area as only a slight depression to a deep one, often with well-differentiated polybrachykinetids; cytoproct distinct, sometimes at the base of a ciliated tube; in terrestrial habitats, widely found as endosymbionts in mammalian hosts, mainly artiodactyls and perissodactyls, with species of the Family Troglodytelliidae restricted to anthropoid apes; three suborders.

### Suborder Archistomatina de Puytorac et al., 1974

Size, often small; shape, ovoid to pyriform; free-swimming; somatic ciliature, holotrichous or limited to girdles, tufts or bands; extrusomes as somatic mucocysts; concrement vacuole present, overlain by 4–5 somatic kineties; oral region, apical, with permanent cytostome surrounded by circumoral monokinetids, closely packed and derived from oralized somatic kinetids, as an adoral polybrachykinety; macronucleus, ellipsoid to elongate ellipsoid; micronucleus, present; contractile vacuole, present, sometimes multiple; cytoproct in posterior body portion; in terrestrial habitats as endosymbionts of vertebrates, typically in horses and camels, but also in rodents, hippopotami, and sometimes ruminants; one family.

### Family Buetschliidae Poche, 1913

With characteristics of suborder; 32 genera.

*Alloiozona* Hsiung, 1930  
*Ampullacula* Hsiung, 1930  
*Amylophorus* Pereira & Almeida, 1942

*Blepharocodon* Bundle, 1895  
*Blepharoconus* Gassovsky, 1919  
*Blepharomonas* Kopperi, 1937  
*Blepharoplanum* Kopperi, 1937  
*Blepharoposthium* Bundle, 1895  
*Blepharosphaera* Bundle, 1895  
*Blepharozoum* Gassovsky, 1919  
*Buetschlia* Schuberg, 1888  
*Buissonella* de Cunha & Muniz, 1925  
*Bundleia* da Cunha & Muniz, 1928  
*Cucurbella* Thurston & Grain, 1971  
*Didesmis* Fiorentini, 1890  
*Hemiprorodon* Strelkow, 1939  
*Holophryoides* Gassovsky, 1919  
*Holophryozoon* Jirovec, 1933  
*Hsiungella* Imai in Aescht, 2001  
*Kopperia* Corliss, 1960  
*Levanderella* Kopperi, 1937  
*Meiostoma* Sandon, 1941  
*Parabundleia* Imai & Ogimoto, 1983  
*Paraisotrichopsis* Gassovsky, 1919  
*Pingius* Hsiung, 1932  
*Plexobundleia* Kornilova, 2005  
*Polymorphella* Corliss, 1960  
*Prorodonopsis* Gassovsky, 1919  
*Protolutzia* da Cunha & Muniz, 1925  
*Pseudobuetschlia* Jirovec, 1933  
*Sciurula* Corliss, 1960  
*Sulcoarcus* Hsiung, 1935  
*Wolskana* Ito, Imai, Ogimoto, & Nakahara, 1996

## Suborder Blepharocorythina Wolska, 1971

Size, small; shape, ovoid, laterally flattened, with a prominent frontal lobe in some species, and distinctive corkscrew-like process in others; free swimming; somatic ciliature markedly reduced, as tufts and bands; presumed remnant of concrement vacuole present only as its overlying somatic kinetids; oral area, apical or subapical, with non-retractable cilia; oral cilia inconspicuous, non-retractable, as extensions of somatic ciliature, forming two groups with presumed homologies to those of entodiniomorphines (i.e., the ventral vestibular kineties or vestibular polybrachykinety and the adoral polybrachykinety); macronucleus, globular to ellipsoid; micronucleus, present; contractile vacuole, present; cytoproct, likely in posterior; in terrestrial habitats, as endosymbionts principally in the hindgut of horses, with a few species in elephants, rhinoceros, primates and cattle; one family.

## Family Blepharocorythidae Hsiung, 1929

With characteristics of the suborder; nine genera

*Blepharocorys* Bundle, 1895

*Charonina* Strand, 1928

*Charonnautes* Strelkow, 1939

*Circodinium* Wolska, 1971

*Gorilloflasca* Ito et al., 2017

*Ochoterenaia* Chavarria, 1933

*Pararaabena* Wolska, 1968

*Raabena* Wolska, 1967

*Spirocorys* Wolska, 1969

## Suborder Entodiniomorphina Reichenow in Doflein & Reichenow, 1929

Size, small to medium, rarely large; shape, typically laterally flattened; somatic ciliature greatly reduced, appearing in tufts, sometimes elongated as spiraled bands, often arranged as polybrachykineties; pellicle firm and thickened, often drawn out into spines; prominent skeletal plates characteristic of many species, composed of polysaccharide reserves, such as - amylopectin granules or plates; oral area, apical to subapical, often retractable; oral cilia organized as polybrachykineties, of two parts, a prevestibular band in the peristomial region and a vestibular part(s) sensu stricto; cytoproct distinct; in terrestrial habitats, widely found as endosymbionts in mammal hosts, mainly in artiodactyls and perissodactyls, with species of the Family Troglodytidae in anthropoid apes; ten families.

## Family Cycloposthiidae Poche, 1913

Size, small to large; shape, elongated, often ovoid, with several genera having unusual finger-like projections (e.g., *Arachnodiniella*, *Phalodinium*); free swimming; somatic cilia, essentially non-retractable, with from none to four caudal tufts or caudalia; skeletal plates, at least one large one, and up to four; oral ciliature in adoral zone, retractable, with adoral polybrachykinety and dorsal perivestibular polybrachykinety; macronucleus, ellipsoid to elongate ellipsoid; micronucleus, present; contractile vacuole, one to several; cytoproct, present; feeding on bacteria and plant fibers; in terrestrial habitats as endosymbionts in the cecum and colon of horses, zebras, rhinoceroses, and tapirs, and occasionally in elephants, capybaras, and hippopotami; 17 genera.

*Arachnodinella* van Hoven, Gilchrist & Hamilton-Attwell in Aescht, 2001

*Bertolinella* Carpano, 1941

*Bozasella* Buisson, 1923

*Carinoposthium* Jankowski, 1980

*Cycloposthium* Bundle, 1895

*Dicycloposthium* Strelkow, 1939  
*Lavierella* Buisson, 1923  
*Monoposthium* Thurston & Noirot-Timothee, 1973  
*Paracycloposthium* Grain, 1994  
*Phalodinium* van Hoven, Gilchrist, & Hamilton-Attwell, 1987  
*Prototapirella* da Cunha, 1918  
*Rhabdothoracella* Aescht, 2001  
*Toxodinium* da Cunha, 1938  
*Tricaudalia* Buisson, 1923  
*Trifascicularia* Strelkow, 1931  
*Tripalmaria* Gassovsky, 1919  
*Triplumaria* Hoare, 1937

#### Family Gilchristinidae (Ito, Van Hoven, Miyazaki, & Imai, 2006)

Size, medium to large; shape, ellipsoid, laterally flattened; free-swimming; somatic cilia, non-retractable, as several equatorial and/or posterior bands; skeletal plates, one or two; oral ciliature of retractable adoral polybrachykinety, accompanied by paralabial kineties, and with vestibular polybrachykinety extending longitudinally into the oral cavity; macronucleus, elongate; micronucleus, present; contractile vacuoles, dorsal, multiple; cytoproct in posterior body portion; in colon of rhinoceros; two genera.

*Digilchristia* Ito, Van Hoven, Miyazaki, & Imai, 2006  
*Gilchristina* (Ito, Van Hoven, Miyazaki, & Imai, 2006)

#### Family Ophryoscolecidae Stein, 1859

Size, small to large; shape, ovoid to fusiform, more or less flattened; free swimming; retractable dorsal ciliary tuft, absent in *Entodinium*, may cover at least 1/3 of body perimeter; skeletal plates commonly present; oral ciliature of retractable adoral polybrachykinety, accompanied by paralabial kineties, with vestibular polybrachykinety extending longitudinally into the oral cavity; macronucleus, typically elongate; micronucleus, present; contractile vacuole, present, variable in number; cytoproct, present; feeding on bacteria, plant detritus, and other ciliates; in terrestrial habitats as endosymbionts in the rumen of artiodactylan ruminants, such as cattle, sheep, goats, deer, antelope, caribou, bison, buffalo, ox, and close relatives, and camels, and intestine of the guinea pig and capybara; 20 genera.

*Caloscolex* Dogiel, 1926  
*Campylodinium* Jankowski, 1975  
*Cunhaia* Hasselmann, 1924  
*Diplodinium* Schuberg, 1888  
*Diploplastron* Kofoed & MacLennan, 1932  
*Elytroplastron* Kofoed & MacLennan, 1932  
*Endoralium* Eloff & van Hoven, 1980

*Enoploplastron* Kofoid & MacLennan, 1932  
*Entodinium* Stein, 1859  
*Eodinium* Kofoid & MacLennan, 1932  
*Epidinium* Crawley, 1923  
*Epiplastron* Kofoid & MacLennan, 1933  
*Eremoplastron* Kofoid & MacLennan, 1932  
*Eudiplodinium* Dogiel, 1927  
*Metadinium* Awerinzew & Mutafova, 1914  
*Ophryoscolex* Stein, 1859  
*Opisthotrichum* Buisson, 1923  
*Ostracodinium* Dogiel, 1927  
*Polyplastron* Dogiel, 1927

Family Parentodiniidae Ito, Miyazaki & Imai, 2002

Size, small; shape, ovoid, laterally compressed, with longitudinal surface striations; free-swimming; somatic ciliature, non-retractable, and no caudalia; no skeleton; oral ciliature as a retractable adoral polybrachykinety, completely encircling vestibular opening, with several vestibular kineties and a set of paralabial kineties to the right of the adoral polybrachykinety; macronucleus, globular to ellipsoid; micronucleus, present; contractile vacuole, present; cytoproct, with ciliary tuft; in terrestrial habitats as endosymbionts in the stomach of hippopotamus and the rumen of cattle; one genus.

*Parentodinium* Thurston & Noirot-Timothee, 1973

Family Polydiniellidae Corliss, 1960

Size, large; shape, fusiform, slightly laterally flattened; free-swimming; somatic ciliature, non-retractable, as 4–12 “accessory ribbons” partially encircling body; skeletal plates present, variable in number and size; oral ciliature as an adoral zone of non-retractable ciliary tufts; vacuole with granular contents in a caudal lobe that bears cilia; macronucleus, ellipsoid to elongate and twisted; micronucleus, present; contractile vacuoles, small, very numerous, arranged in transverse rows cytoproct, present; feeding on bacteria, flagellates, plant debris, and other organic particles; in terrestrial habitats as endosymbionts in the cecum and colon of elephants only; four genera.

*Elephantophilus* Kofoid, 1935  
*Polydiniella* Corliss, 1960  
*Pterodiniella* Aescht, 2001  
*Thoracodinium* Latteur, 1958

Family Pseudoentodiniidae Wolska, 1986



Size, small; shape, ovoid, slightly flattened; free-swimming; skeletal plates, anterior, slit-like; somatic ciliature, absent; oral ciliature, a retractable adoral zone of a single, broad adoral polybrachykinety with dorsal part divided into an anterior and posterior fragment and longitudinal files extending along the vestibular wall; macronucleus, ellipsoid; micronucleus, present; contractile vacuole, present; cytoproct, present; in terrestrial habitats as endosymbionts in the digestive tract of elephants; one genus.

*Pseudoentodinium* Wolska, 1986

#### Family Rhinozetidae Van Hoven, Gilchrist, & Hamilton-Attwell, 1988

Size, small; shape, ovoid, flattened; free-swimming; somatic ciliary tufts, non-retractable, occurring in three to five short bands on left and right body surfaces; skeletal plates in varying numbers and sizes; oral ciliature as an adoral zone on a retractable cone; macronucleus, elongate band-form; micronucleus, present; contractile vacuoles, 2–6, between macronucleus and cell surface; cytoproct, present; in terrestrial habitats as endosymbionts in the cecum and colon of rhinoceros; one genus.

*Rhinozeta* van Hoven, Gilchrist, & Hamilton-Attwell, 1988

#### Family Spirodiniidae Strelkow, 1939

Size, medium; shape, elongated to globose, often markedly laterally flattened; free-swimming; somatic cilia as 2–4 non-retractable ribbons or bands, spiralling around body at different levels; no skeletal plates; oral ciliature, non-retractable, in two bands, with adoral polybrachykinety and dorsal perivestibular polybrachykinety; macronucleus, elongate and band-form; micronucleus, present; contractile vacuole, one or two; cytoproct, present; in terrestrial habitats as endosymbionts predominantly in the colon and cecum of horses; six genera.

*Cochliatoxum* Gassovsky, 1919

*Ditoxum* Gassovsky, 1919

*Gassovskiella* Grain, 1994

*Spirodinium* Fiorentini, 1890

*Tetratoxum* Gassovsky, 1919

*Triadinium* Fiorentini, 1890

#### Family Telamodiniidae Latteur & Dufey, 1967

Size, medium; shape, elongate; free-swimming; somatic cilia as five, non-retractable, “accessory ciliary ribbons” partially encircling body; two or three skeletal plates present; oral ciliature of adoral zone, retractable; macronucleus, elongate; micronucleus, present; contractile vacuole, present, may be multiple;

cytoproct, present; in terrestrial habitats as endosymbionts in the colon of the desert wart-hog; three genera.

*Megadinium* Latteur & Dufey, 1967

*Telamodinium* Latteur & Dufey, 1967

*Teratodinium* Latteur & Dufey, 1967

#### Family Troglodytelliidae Corliss, 1979

Size, medium to large; shape, ovoid, fusiform, laterally flattened; free-swimming; somatic cilia as 3–5 non-retractable bands encircling body, essentially perpendicular to longitudinal axis; skeletal plates, large, both dorsal and ventral, fusing to envelope anterior half of organism; cell surface between ciliary bands divided by deep cortical grooves into elongated rectangles; oral ciliature of adoral zone, retractable, polybrachykinety; macronucleus, L-shaped; micronucleus, present; contractile vacuole, multiple, in transverse rows; cytoproct, present; feeding on bacteria and detritus; in terrestrial habitats as endosymbionts in the colon of anthropoid apes only; two genera.

*Gorillophilus* Imai, Ikeda, Collet, & Bonhomme, 1991

*Troglodytella* Brumpt & Joyeux, 1912

### Order Macropodiniida

Size, small to medium; shape, ovoid to elongate; free-swimming; somatic ciliature, holotrichous, but may be reduced to a dorso ventral groove in macropodiniids; extrusomes as somatic mucocysts; oral cavity, anterior, a shallow to deep vestibulum lined by extensions of somatic kineties, and supported by nematodesmata arising from these kinetids; stomatogenesis, telokinetal or cryptotelokinetal, possibly apokinetal; macronucleus, spheroid to elongate band-form; micronucleus, present; contractile vacuole, present; cytoproct, present; feeding on bacteria, starch, and in larger forms, other ciliates; in terrestrial habitats as endosymbionts in the forestomach of macropodid and vombatid marsupials; three families.

#### Family Amylovoracidae Cameron & O'Donoghue, 2002

Size, small to medium; shape, ovoid, slightly flattened; free-swimming; somatic ciliature, holotrichous, sometimes spiralling and/or separated into longitudinal bands of closely adjacent kineties by broad interkinetal ridges; extrusomes as somatic mucocysts; oral ciliature as extensions of somatic kineties or in isolated vestibular fields; macronucleus, ellipsoid to elongate band form; micronucleus, present; contractile vacuole, present; cytoproct, may be present; feeding mainly on starch and bacteria; in terrestrial habitats as endosymbionts in the forestomach of macropodid and vombatid marsupials; three genera.

*Amylovorax* Cameron & O'Donoghue, 2002

*Bandia* Cameron & O'Donoghue, 2002

*Bitricha* Cameron, O'Donoghue, & Adlard, 2000

#### Family Macropodiniidae Dehority, 1996

Size, small to medium; shape, ovoid, flattened; free-swimming; cortical alveoli divided by transverse grooves, elaborated into strikingly trapezoidal and parallelogram shapes, filled with dense material; somatic cilia, holotrichous or restricted to kineties lying in a dorso ventral groove that encircles the body; extrusomes as somatic mucocysts; oral cavity, conical, bordered or lined by extensions of somatic kineties; macronucleus, globular to ellipsoid; micronucleus, present; contractile vacuole, present; cytoproct, present; feeding on bacteria, starch grains, and smaller ciliates; in terrestrial habitats as endosymbionts in the stomach of macropodid marsupials; one genus and one genus *incertae sedis*.

*Macropodinium* Dehority, 1996

*Incertae sedis* in Family Macropodiniidae

*Megavestibulum* Cameron & O'Donoghue, 2003

#### Family Polycostidae Cameron & O'Donoghue, 2003

Size, small to medium; shape, stout ovoid; free-swimming; somatic ciliature, holotrichous, with meridional kineties that can be separated by broad interkinetal ridges filled with many, small dense bodies; oral cavity, a conical, round or flattened vestibulum in cross section, lined by extensions of some somatic kineties only along right side; macronucleus, globular to ellipsoid; micronucleus, present; contractile vacuole, one or more; cytoproct, present; feeding on bacteria and starch; in terrestrial habitats as endosymbionts in the forestomach of macropodid marsupials; one genus.

*Polycosta* Cameron & O'Donoghue, 2003
